# Supplementary material for: The Role of Ultrasound in the Preparation of Zein Nanoparticles/Flaxseed Gum Complexes for the Stabilization of Pickering Emulsion
Source: MDPI journal article supplement (doi:10.3390/foods10091990), 2021-08-25
Supplement: s1 [file s1]

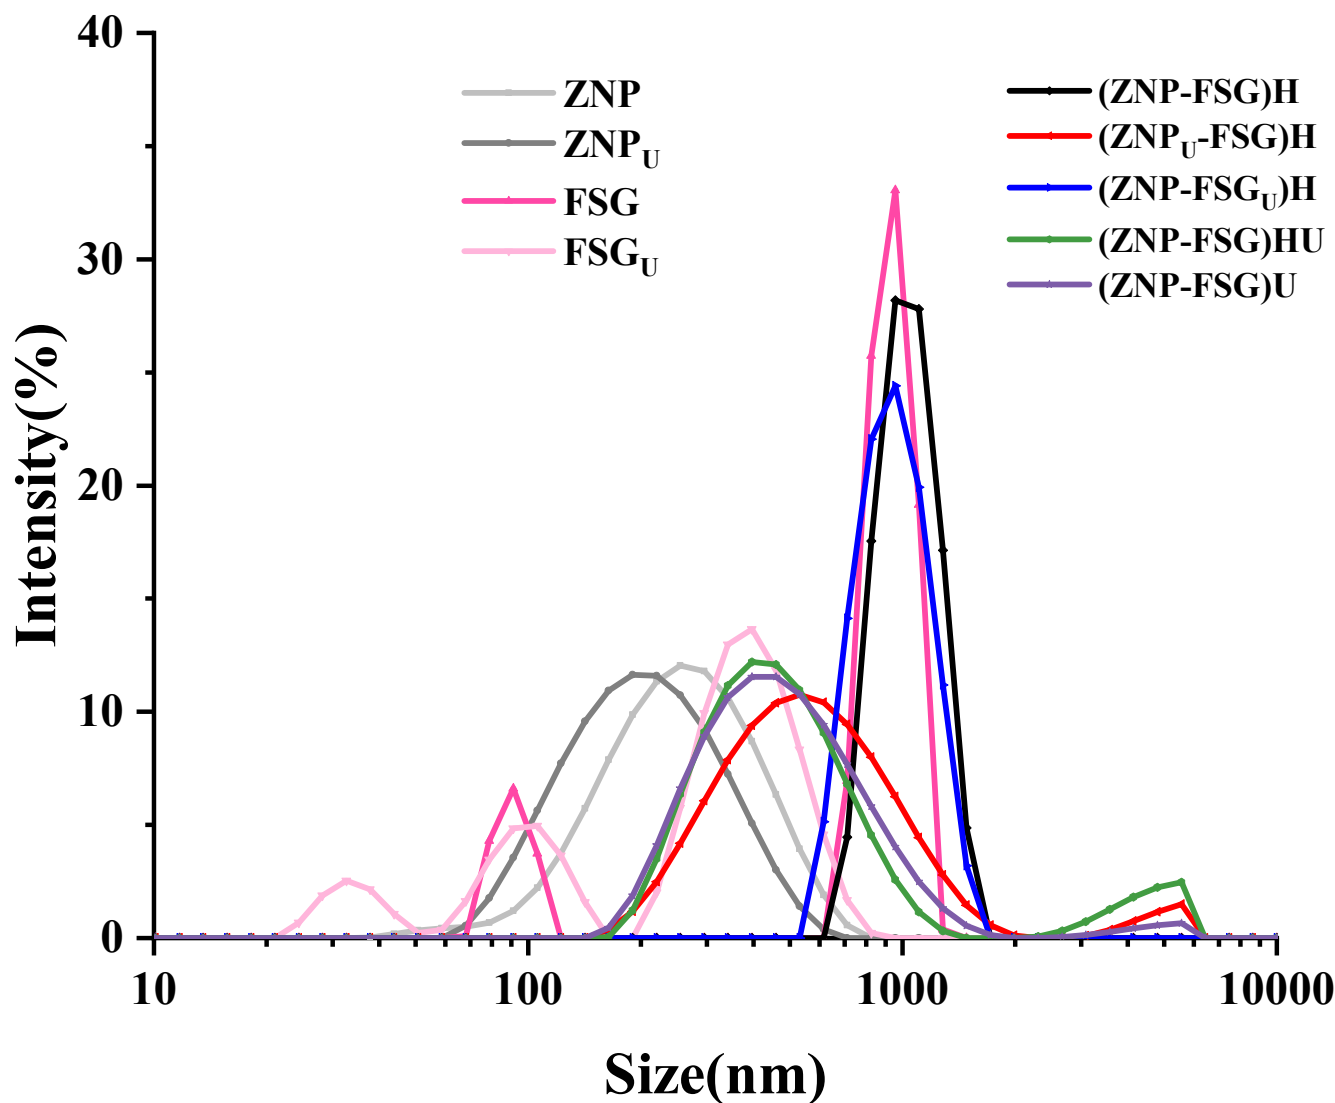

Figure S1 The particle size distribution of 9 various ingredients or ZNP -FSG complexes subjected to various ultrasound and homogenization treatments
